# Supplementary material for: Ovariectomy induces bone loss via microbial-dependent trafficking of intestinal TNF+ T cells and Th17 cells
Source: JCI journal article supplement (doi:10.1172/jci143137), 2021-02-14
Supplement: sd1 [file 1]

301 Moved Permanently

# Moved Permanently

The document has moved here.
